# Supplementary material for: Hydrogen-designed spin-states of 2D silicon carbide and graphene nanostructures
Source: Royal Society of Chemistry journal article supplement (doi:10.1039/d4cp02762k), 2024-01-01
Supplement: d4cp02762k1.pdf [file d4cp02762k1.pdf]

## Supplementary Materials for: Hydrogen-designed spin-states of 2D silicon carbide and graphene nanostructures

L. Fiorini Filho<sup>a</sup>, W. P. Morais<sup>a</sup>, N. N. Batista<sup>a</sup>, F. A. L. de Souza<sup>b</sup>, A. J. C.  
Varandas<sup>a,c,d</sup>, W. S. Paz<sup>a</sup>, F. N. N. Pansini<sup>a</sup>

<sup>a</sup>*Departamento de Física Universidade Federal do Espírito Santo Vitória 29075-910 Brazil*

<sup>b</sup>*Instituto Federal de Educação Ciência e Tecnologia do Espírito Santo - Ibatiba*

<sup>c</sup>*Department of Physics Qufu Normal University China*

<sup>d</sup>*Department of Chemistry and Chemistry Centre University of Coimbra 3004-535 Coimbra  
Portugal*

---

---

---

*Email addresses:* [wendel.paz@ufes.br](mailto:wendel.paz@ufes.br) (W. S. Paz), [fernando.pansini@ufes.br](mailto:fernando.pansini@ufes.br) (F. N. N. Pansini)

*Preprint submitted to Carbon*

*June 25, 2024*

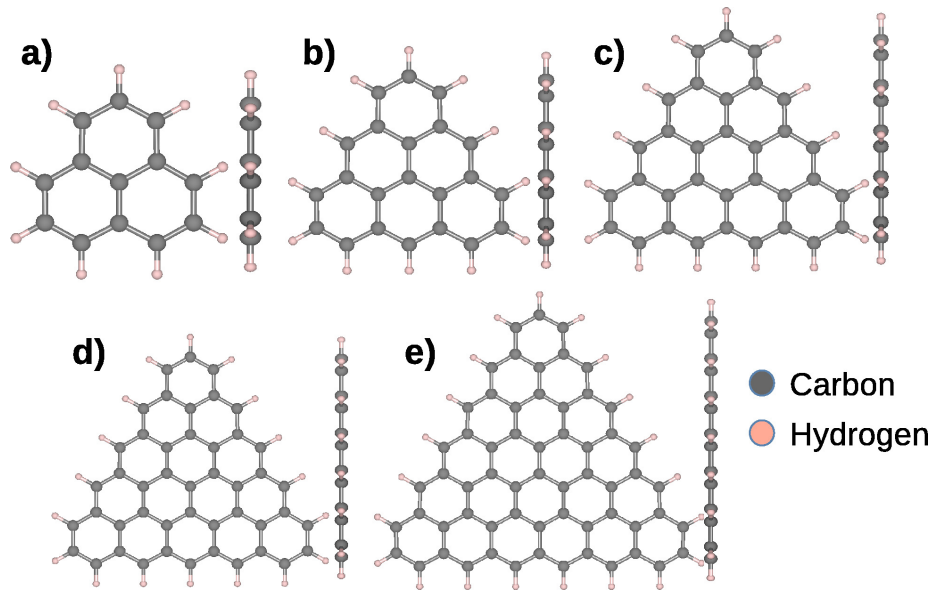

Figure 1: Top and side views of ground state geometries obtained at B3LYP/def2-SVP level of theory for  $N_R$ -GRt with  $N_R = 2 - 6$ .

Table 1: Formation energy for the adsorbed hydrogen atoms on both  $N_R$ -SiC and  $N_R$ -GRt systems, calculated for all three sublattice adsorption cases A, B, and AB.

| system | sublattice | adsorbed energy (eV) |
|--------|------------|----------------------|
| 3-GRt  | sub-a      | -1.59                |
|        | sub-ab     | -1.57                |
|        | sub-b      | -0.82                |
| 6-GRt  | sub-a      | -1.33                |
|        | sub-ab     | -1.49                |
|        | sub-b      | -0.88                |
| 3-SiCt | sub-a      | -2.88                |
|        | sub-ab     | -2.42                |
|        | sub-b      | -1.60                |
| 6-SiCt | sub-a      | -2.65                |
|        | sub-ab     | -2.36                |
|        | sub-b      | -1.38                |

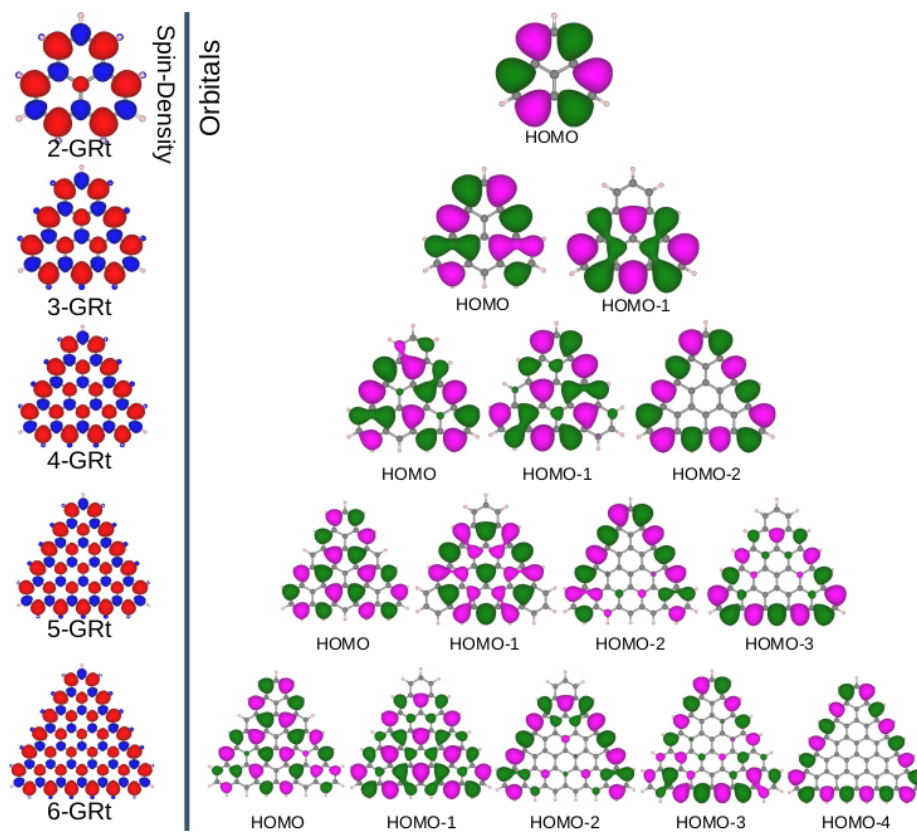

Figure 2: Spin density and open shell molecular orbitals for  $N_R$ -GRt systems. iso-surface = 0.002, and =0.015 for the spin density and molecular orbitals respectively.

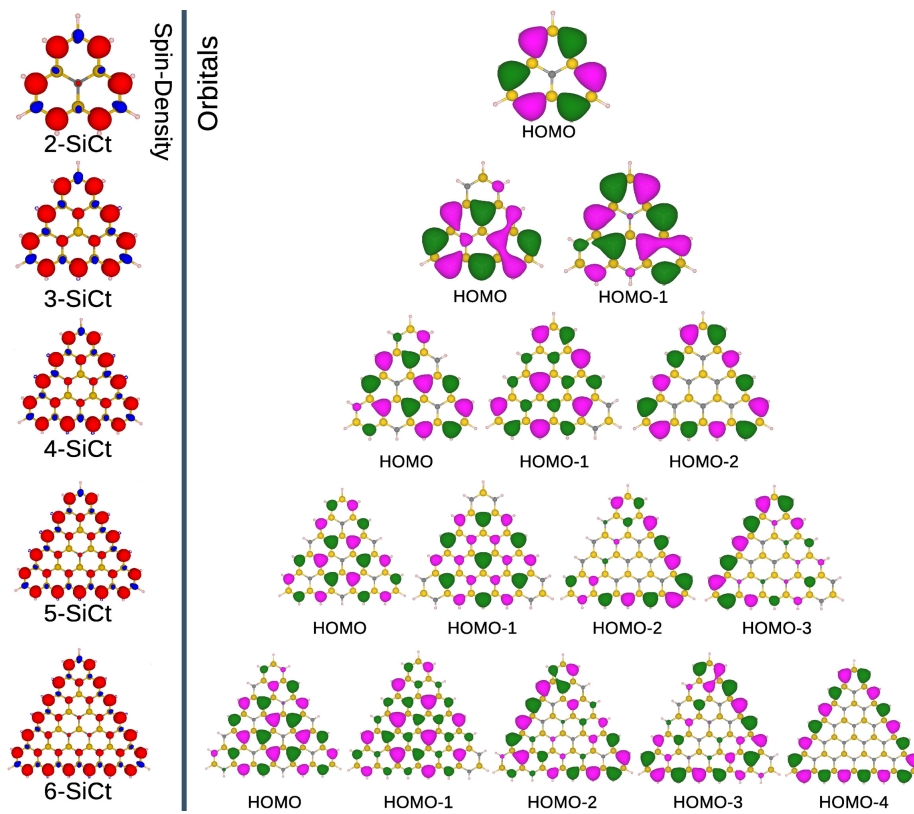

Figure 3: Spin density and open shell molecular orbitals for  $N_R$ -SiCt systems, iso-surface = 0.002, and =0.015 for the spin density and molecular orbitals respectively

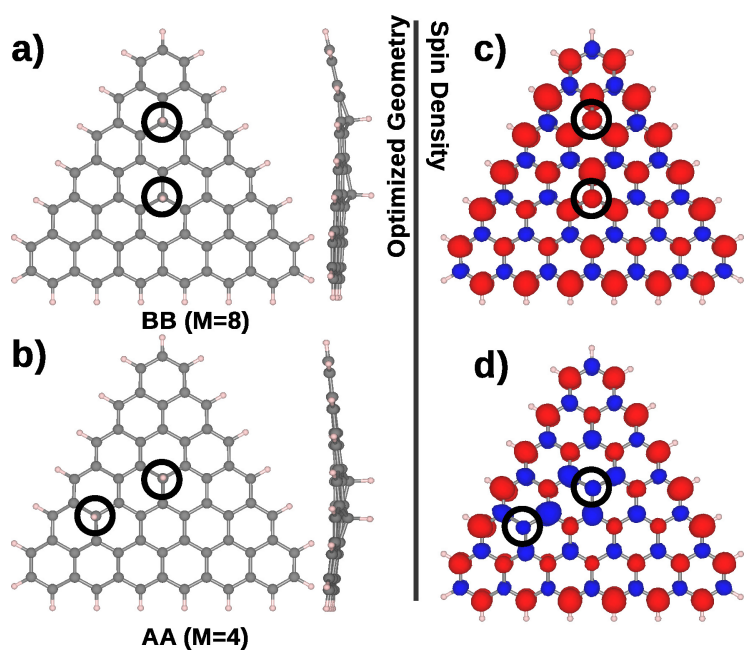

Figure 4: Spin density and open shell molecular orbitals for  $N_R$ -SiCt systems, iso-surface = 0.002, and =0.015 for the spin density and molecular orbitals respectively

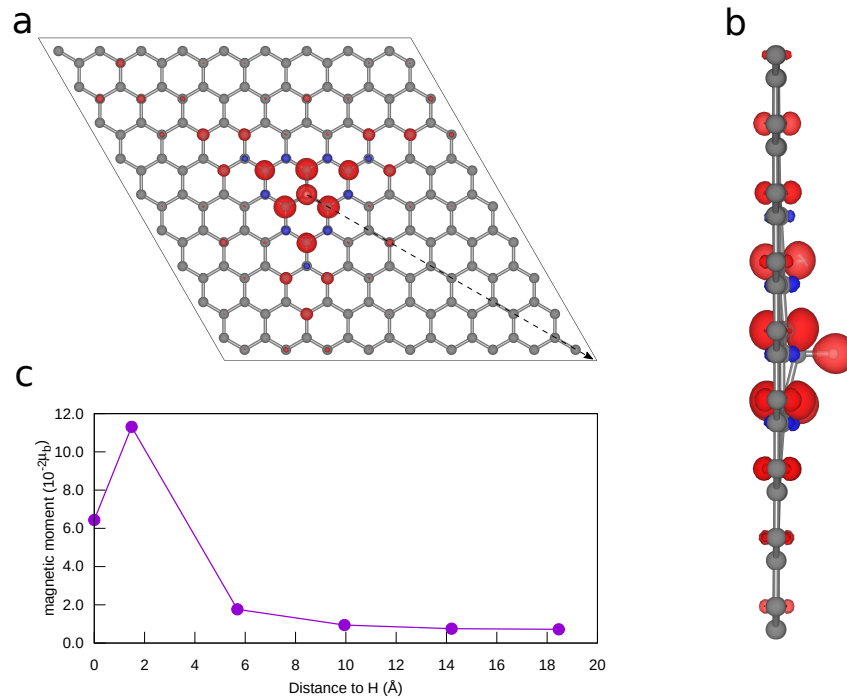

Figure 5: Figure (a) depicts the spin density of a hydrogen atom adsorbed in a 9x9 GR supercell from both the top and (b) side views. The isosurface set was 0.002. The red (blue) region represents positive (negative) spin density values, while the dotted arrow indicates the path taken to create the magnetic moment vs. distance graph. (c) Display the variation in the magnetic moment in relation to the site's in-plane distance from the H. The dots on the graph represent the opposite sub-lattice where H was adsorbed; the same sub-lattice values were not plotted because the magnetic moment was small and practically constant.
